# Supplementary material for: Detection of Pathogenic Isoforms of IKZF1 in Leukemic Cell Lines and Acute Lymphoblastic Leukemia Samples: Identification of a Novel Truncated IKZF1 Transcript in SUP-B15
Source: MDPI journal article supplement (doi:10.3390/cancers12113161), 2020-10-28
Supplement: s1 [file s1]

Supplementary Materials

# Detection of Pathogenic Isoforms of *IKZF1* in Leukemic Cell Lines and Acute Lymphoblastic Leukemia Samples: Identification of a Novel Truncated IKZF1 Transcript in SUP-B15

Weiqliang Zhao, Ying Li, Chenjiao Yao, Guojuan Zhang, Kevin Zhao, Wei Chen, Peng Ru, Xiaokang Pan, Huolin Tu and Dan Jones

A

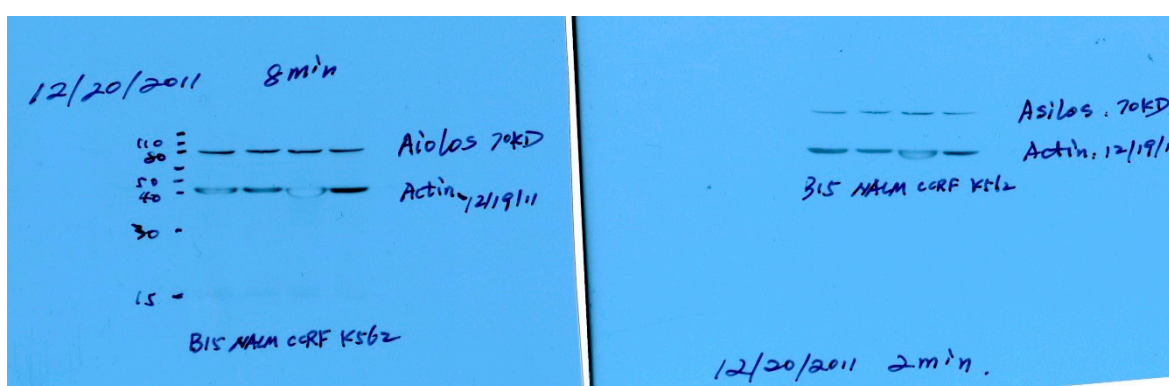

B

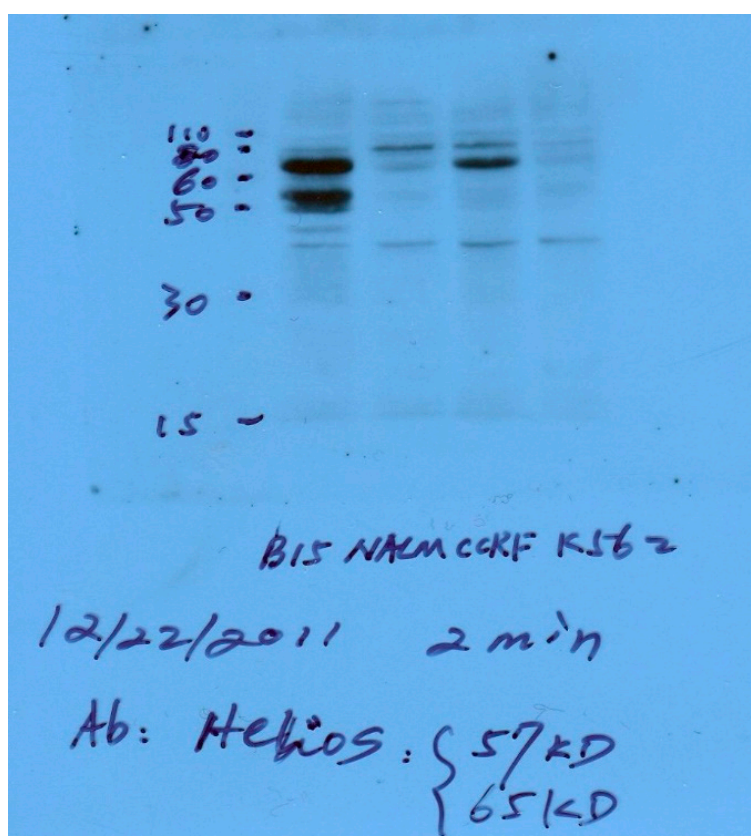

C

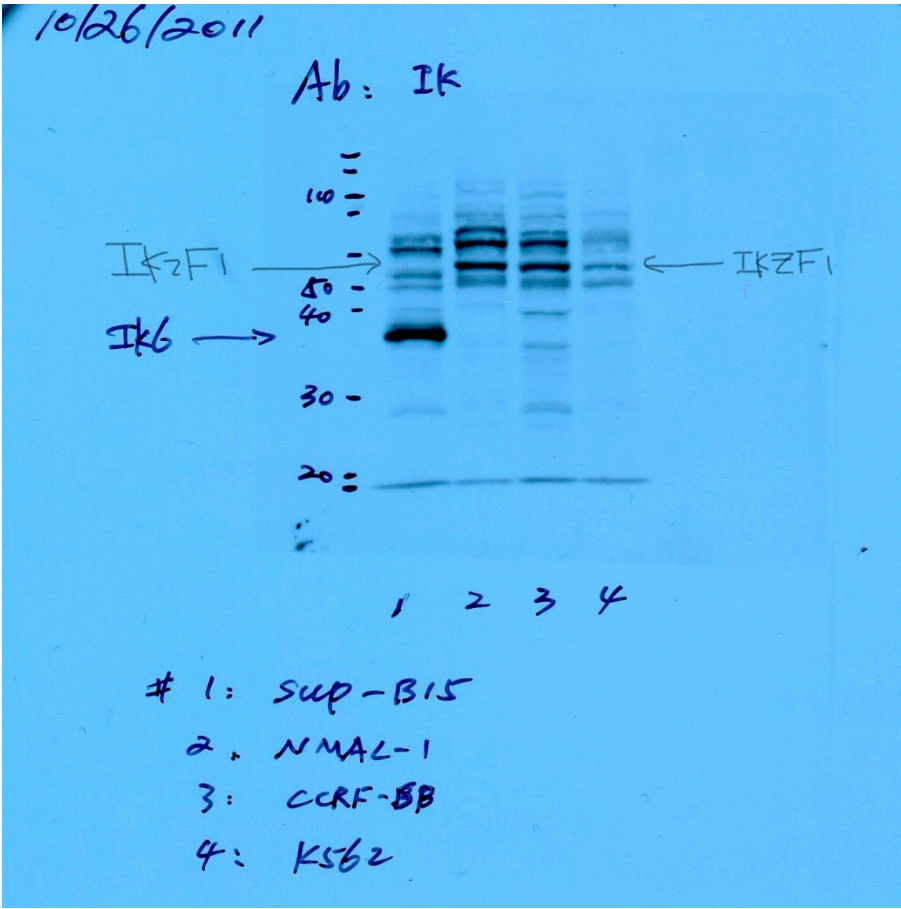

D

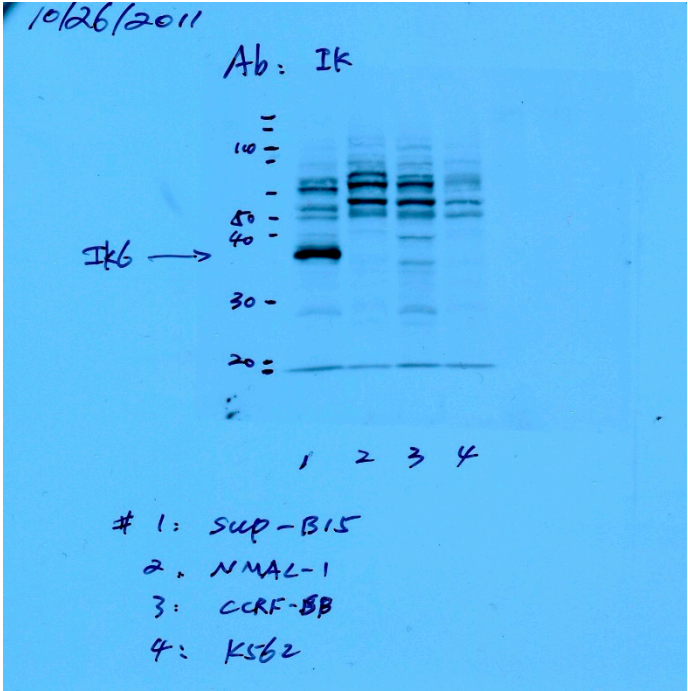

Figure S1. Uncropped Western Blotting figures of Figure 3.
